# Supplementary material
Source: PubMed Central journal article supplement (PMC6657443)

## SUPPLEMENTARY MATERIALS OF

### "Evolution of the yeast recombination landscape"

By Liu, Maclean, and Zhang (jianzhi@umich.edu)

#### The supplementary materials include:

**Table S1.** Summary statistics of the sequencing data.

**Table S2.** Correlation between local CO rate and heterozygosity and that between local NCO rate and heterozygosity at different scales.

**Fig. S1.** Distribution of markers in three hybrid yeast strains analyzed in this study. Marker density is measured by the number of markers per nucleotide in 20 kb windows. X-axis shows genomic positions on each chromosome ( $\times 100$  kb).

**Fig. S2.** Correction of the number of NCO events per meiosis. (A) Mean number of markers per tract as a function of tract length. For each tract length from 100 bp to 3000 bp with a step size of 100 bp, 10,000 random NCO events are simulated and the mean number of markers converted among tracts with at least one marker is calculated and plotted against tract length. (B)

Probability of detection of a tract in the simulation as a function of tract length. In the real data, an average NCO event converts 18 markers, corresponding to a tract length of 1500 bp in panel A; this tract length corresponds to a detection probability of 0.985 in panel B.

**Fig. S3.** Tract length distributions for NCO (A) and CO-GeneConv (B) events in *Spar*.

**Fig. S4.** Comparison of CO and NCO rates (number of events per Mb per meiosis) among different chromosomal regions.

**Fig. S5.** CO and NCO counts per meiosis in each chromosome, and CO and NCO rates per Mb per meiosis in each chromosome in *Scer* and *Spar*. Pearson's correlation coefficient and associated *P*-value are shown in each panel. (A) Relationship between CO count and chromosome length in *Scer*. (B) Relationship between NCO count and chromosome length in *Scer*. (C) Relationship between CO count and chromosome length in *Spar*. (D) Relationship between NCO count and chromosome length in *Spar*. (E) Relationship between CO rate and chromosome length in *Scer*. (F) Relationship between NCO rate and chromosome length in

*Scer*. (G) Relationship between CO rate and chromosome length in *Spar*. (H) Relationship between NCO rate and chromosome length in *Spar*.

**Fig. S6.** Variations of CO and NCO rates relative to DSB rates with respect to several factors in *Scer* and *Spar*. (A) The CO/DSB rate ratio in regions of various distances to centromere. (B) The CO/DSB rate ratio in regions of various GC contents. (C) The CO/DSB rate ratio in regions of various gene densities. (D) The NCO/DSB rate ratio in regions of various distances to centromere. (E) The NCO/DSB rate ratio in regions of various gene densities. On the X-axis of panels A and D, “1” indicates the 20 kb bin closest to centromere, “2” indicates the next closest 20 kb bin, and so on. In panel B, 20 kb windows are binned based on the GC content, which ranges from 35.5% to 42.5% with a step size of 1%. In (C) and (E), 20 kb windows are binned based on gene density (# of genes per 20 kb), which ranges from 5 to 18 with a step size of 2. In each bin, the data are presented as a bar plot; the lower and upper edges of a box represent the first ( $qu_1$ ) and third quartiles ( $qu_3$ ), respectively, the horizontal line inside the box indicates the median ( $md$ ), the whiskers extend to the most extreme values inside inner fences,  $md \pm 1.5(qu_3 - qu_1)$ , and the dots represent values outside the inner fences (outliers). Wilcoxon rank-sum tests are performed between each bin and all other bins combined, and the associated  $P$ -values are shown above each bin.

**Fig. S7.** Comparison of heterozygosity in 1 kb regions around COs, NCOs, and one million random sites. In each bin, data are presented as a bar plot. The lower and upper edges of a box represent the first ( $qu_1$ ) and third quartiles ( $qu_3$ ), respectively, the horizontal line inside the box indicates the median ( $md$ ), the whiskers extend to the most extreme values inside inner fences,  $md \pm 1.5(qu_3 - qu_1)$ , and the dots represent values outside the inner fences (outliers). Wilcoxon rank-sum tests are performed between COs (or NCOs) and random sites with  $P$ -values presented at the top.

Table S1. Summary statistics of the sequencing data. N17 and N44 are the parental *Spar* strains, whereas the rest are meiotic spores. Each tetrad has a unique number, and the four spores of the tetrad are marked with A, B, C, and D.

| Samples | Sequencing depth | Genomic coverage |
|---------|------------------|------------------|
| N17     | 51.87            | 0.99             |
| N44     | 53.30            | 1                |
| 1A      | 11.58            | 0.99             |
| 1B      | 11.45            | 0.99             |
| 1C      | 11.53            | 0.99             |
| 1D      | 11.46            | 0.99             |
| 2A      | 11.47            | 0.99             |
| 2B      | 11.27            | 0.99             |
| 2C      | 11.52            | 0.99             |
| 2D      | 11.45            | 0.99             |
| 3A      | 11.55            | 0.99             |
| 3B      | 11.41            | 0.99             |
| 3C      | 11.48            | 0.99             |
| 3D      | 11.41            | 0.99             |
| 4A      | 11.49            | 0.99             |
| 4B      | 11.42            | 0.99             |
| 4C      | 11.46            | 0.99             |
| 4D      | 11.52            | 0.99             |
| 5A      | 11.64            | 0.99             |
| 5B      | 11.51            | 0.99             |
| 5C      | 11.53            | 0.99             |
| 5D      | 11.36            | 0.99             |
| 6A      | 11.47            | 0.99             |
| 6B      | 11.41            | 0.99             |
| 6C      | 11.36            | 0.99             |
| 6D      | 11.49            | 0.99             |
| 7A      | 11.16            | 0.99             |
| 7B      | 11.39            | 0.99             |
| 7C      | 11.59            | 0.99             |
| 7D      | 11.71            | 0.99             |
| 8A      | 11.24            | 0.99             |
| 8B      | 11.54            | 0.99             |
| 8C      | 11.41            | 0.99             |
| 8D      | 13.81            | 1                |
| 9A      | 11.68            | 0.99             |
| 9B      | 13.90            | 0.99             |
| 9C      | 11.45            | 0.99             |
| 9D      | 11.59            | 0.99             |
| 10A     | 11.46            | 0.99             |
| 10B     | 12.64            | 0.99             |
| 10C     | 10.79            | 0.99             |
| 10D     | 11.41            | 0.99             |

|     |       |      |
|-----|-------|------|
| 11A | 11.37 | 0.99 |
| 11B | 11.47 | 0.99 |
| 11C | 11.52 | 0.99 |
| 11D | 13.84 | 0.99 |
| 12A | 11.38 | 0.99 |
| 12B | 11.48 | 0.99 |
| 12C | 11.51 | 0.99 |
| 12D | 11.49 | 0.99 |
| 13A | 11.46 | 0.99 |
| 13B | 11.49 | 0.99 |
| 13C | 11.65 | 0.99 |
| 13D | 11.61 | 0.99 |
| 14A | 11.55 | 0.99 |
| 14B | 11.21 | 0.99 |
| 14C | 11.52 | 0.99 |
| 14D | 11.36 | 0.99 |
| 15A | 11.48 | 0.99 |
| 15B | 11.44 | 0.99 |
| 15C | 11.45 | 0.99 |
| 15D | 11.58 | 0.99 |
| 16A | 11.45 | 0.99 |
| 16B | 11.45 | 0.99 |
| 16C | 11.56 | 0.99 |
| 16D | 11.45 | 0.99 |
| 17A | 11.61 | 0.99 |
| 17B | 11.50 | 0.99 |
| 17C | 11.43 | 0.99 |
| 17D | 11.52 | 0.99 |
| 18A | 11.51 | 0.99 |
| 18B | 11.48 | 0.99 |
| 18C | 11.47 | 0.99 |
| 18D | 11.48 | 0.99 |
| 19A | 13.51 | 0.99 |
| 19B | 11.43 | 0.99 |
| 19C | 11.39 | 0.99 |
| 19D | 11.49 | 0.99 |
| 20A | 14.84 | 0.99 |
| 20B | 11.52 | 0.99 |
| 20C | 11.45 | 0.99 |
| 20D | 11.46 | 0.99 |
| 21A | 11.44 | 0.99 |
| 21B | 11.50 | 0.99 |
| 21C | 11.45 | 0.99 |
| 21D | 11.39 | 0.99 |
| 22A | 11.46 | 0.99 |
| 22B | 11.33 | 0.99 |
| 22C | 11.44 | 0.99 |

|     |       |      |
|-----|-------|------|
| 22D | 11.48 | 0.99 |
| 23A | 11.55 | 0.99 |
| 23B | 11.38 | 0.99 |
| 23C | 11.47 | 0.99 |
| 23D | 11.43 | 0.99 |
| 24A | 11.52 | 0.99 |
| 24B | 11.37 | 0.99 |
| 24C | 11.46 | 0.99 |
| 24D | 13.04 | 0.99 |
| 25A | 12.08 | 0.99 |
| 25B | 10.19 | 0.99 |
| 25C | 11.15 | 0.99 |
| 25D | 11.18 | 0.99 |
| 26A | 10.30 | 0.99 |
| 26B | 9.85  | 0.99 |
| 26C | 10.06 | 0.99 |
| 26D | 10.49 | 0.99 |
| 27A | 12.17 | 0.99 |
| 27B | 11.62 | 0.99 |
| 27C | 11.42 | 0.99 |
| 27D | 12.52 | 0.99 |
| 28A | 11.58 | 0.99 |
| 28B | 10.66 | 0.99 |
| 28C | 12.89 | 0.99 |
| 28D | 11.21 | 0.99 |
| 30A | 13.71 | 0.99 |
| 30B | 13.43 | 0.99 |
| 30C | 12.25 | 0.99 |
| 30D | 14.11 | 1    |
| 31A | 12.30 | 1    |
| 31B | 13.13 | 0.99 |
| 31C | 11.88 | 0.99 |
| 31D | 12.75 | 0.99 |
| 32A | 13.96 | 0.99 |
| 32B | 13.49 | 0.99 |
| 32C | 12.95 | 0.99 |
| 32D | 12.77 | 1    |
| 33A | 10.81 | 0.99 |
| 33B | 11.99 | 0.99 |
| 33C | 11.17 | 0.99 |
| 33D | 11.99 | 0.99 |
| 34A | 13.12 | 0.99 |
| 34B | 11.15 | 0.99 |
| 34C | 12.82 | 0.99 |
| 34D | 13.49 | 0.99 |
| 35A | 12.54 | 0.99 |
| 35B | 11.33 | 1    |

|     |       |      |
|-----|-------|------|
| 35C | 11.70 | 0.99 |
| 35D | 11.79 | 1    |
| 36A | 13.20 | 0.99 |
| 36B | 11.94 | 0.99 |
| 36C | 12.89 | 0.99 |
| 36D | 13.14 | 0.99 |
| 37A | 14.92 | 0.99 |
| 37B | 11.87 | 0.99 |
| 37C | 12.27 | 0.99 |
| 37D | 12.62 | 0.99 |
| 38A | 10.77 | 0.99 |
| 38B | 12.64 | 0.99 |
| 38C | 12.89 | 0.99 |
| 38D | 11.18 | 0.99 |
| 39A | 10.18 | 0.99 |
| 39B | 11.44 | 0.99 |
| 39C | 11.86 | 0.99 |
| 39D | 11.10 | 0.99 |
| 40A | 11.64 | 0.99 |
| 40B | 12.22 | 0.99 |
| 40C | 10.19 | 0.99 |
| 40D | 12.78 | 0.99 |
| 41A | 13.55 | 0.99 |
| 41B | 11.17 | 0.99 |
| 41C | 12.84 | 0.99 |
| 41D | 12.15 | 0.99 |
| 42A | 11.84 | 0.99 |
| 42B | 14.04 | 1    |
| 42C | 12.54 | 0.99 |
| 42D | 12.49 | 0.99 |
| 43A | 13.63 | 0.99 |
| 43B | 14.43 | 0.99 |
| 43C | 13.50 | 0.99 |
| 43D | 11.39 | 0.99 |
| 44A | 11.75 | 0.99 |
| 44B | 12.43 | 0.99 |
| 44C | 13.34 | 0.99 |
| 44D | 11.77 | 0.99 |
| 45A | 11.04 | 0.99 |
| 45B | 12.11 | 0.99 |
| 45C | 13.20 | 0.99 |
| 45D | 11.28 | 0.99 |
| 46A | 13.67 | 1    |
| 46B | 12.84 | 0.99 |
| 46C | 11.50 | 0.99 |
| 46D | 11.39 | 0.99 |
| 47A | 11.37 | 0.99 |

|     |       |      |
|-----|-------|------|
| 47B | 11.50 | 0.99 |
| 47C | 11.45 | 0.99 |
| 47D | 11.42 | 0.99 |
| 48A | 11.55 | 0.99 |
| 48B | 11.40 | 0.99 |
| 48C | 11.35 | 0.99 |
| 48D | 11.34 | 0.99 |
| 49A | 11.23 | 0.99 |
| 49B | 11.28 | 0.99 |
| 49C | 11.35 | 0.99 |
| 49D | 11.23 | 0.99 |
| 50A | 11.28 | 0.99 |
| 50B | 11.21 | 0.99 |
| 50C | 11.21 | 0.99 |
| 50D | 11.24 | 0.99 |
| 51A | 11.18 | 0.99 |
| 51B | 11.37 | 0.99 |
| 51C | 11.29 | 0.99 |
| 51D | 11.34 | 0.99 |

---

|         |       |      |
|---------|-------|------|
| Average | 12.22 | 0.99 |
|---------|-------|------|

Table S2. Correlation between local CO rate and heterozygosity and that between local NCO rate and heterozygosity at different scales.

| Variables                   | Window size | <i>Scer</i> (YJM789 × S96) |                 | <i>Scer</i> (YJM789 × YPS128) |                 | <i>Spar</i> (N44 × N17) |                 |
|-----------------------------|-------------|----------------------------|-----------------|-------------------------------|-----------------|-------------------------|-----------------|
|                             |             | Spearman's $\rho$          | <i>P</i> -value | Spearman's $\rho$             | <i>P</i> -value | Spearman's $\rho$       | <i>P</i> -value |
| CO rate and heterozygosity  |             |                            |                 |                               |                 |                         |                 |
|                             | 5 kb        | 0.0992                     | 1.1e-5          | 0.0177                        | 0.43            | -0.0367                 | 0.10            |
|                             | 10 kb       | 0.0987                     | 0.0020          | 0.0108                        | 0.74            | -0.0658                 | 0.039           |
|                             | 20 kb       | 0.129                      | 0.0041          | 0.0225                        | 0.62            | -0.0308                 | 0.50            |
|                             | 40 kb       | 0.116                      | 0.081           | 0.0201                        | 0.76            | 0.00415                 | 0.95            |
| NCO rate and heterozygosity |             |                            |                 |                               |                 |                         |                 |
|                             | 5 kb        | 0.244                      | 5.7e-28         | 0.0454                        | 0.044           | 0.00865                 | 0.70            |
|                             | 10 kb       | 0.283                      | 1.8e-19         | 0.0753                        | 0.018           | -0.00672                | 0.83            |
|                             | 20 kb       | 0.329                      | 6.8e-14         | 0.0700                        | 0.12            | -0.0268                 | 0.55            |
|                             | 40 kb       | 0.347                      | 9.2e-8          | 0.107                         | 0.11            | -0.0213                 | 0.75            |



Marker density

0.025  
0.020  
0.015  
0.010  
0.005  
0.000

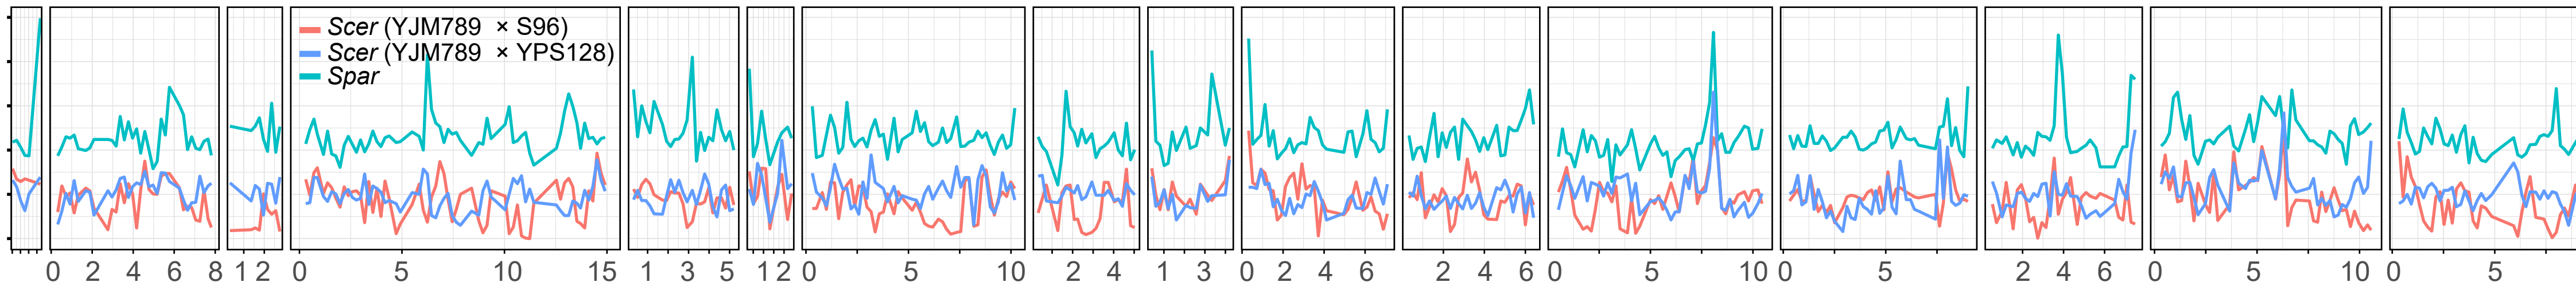

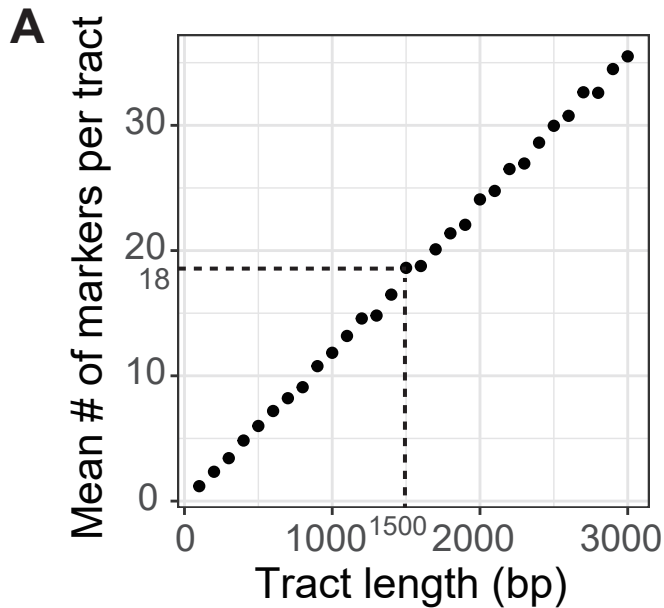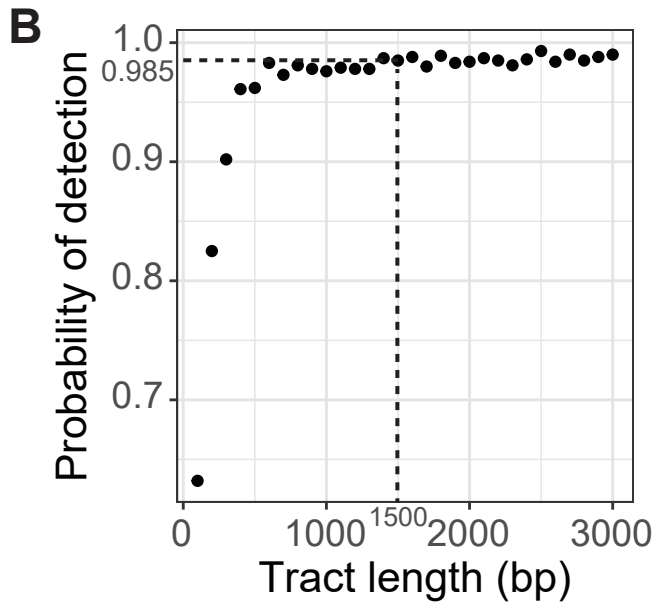

**A**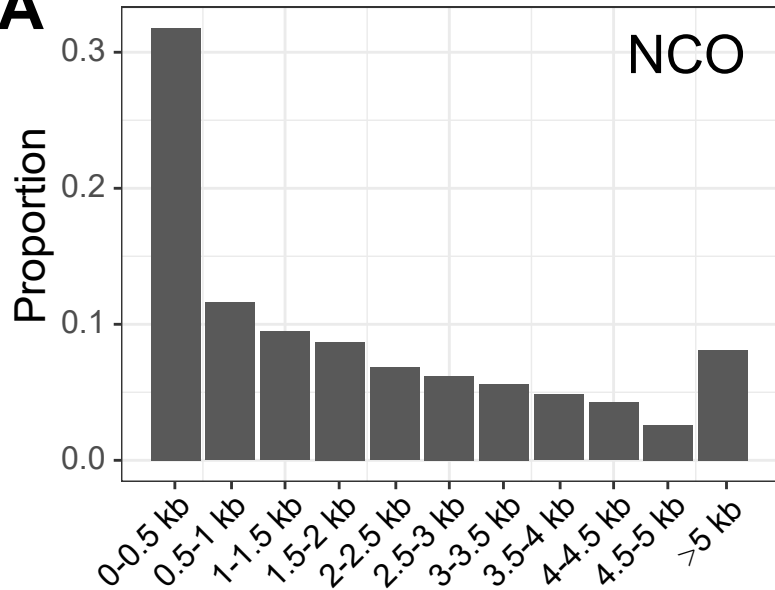**B**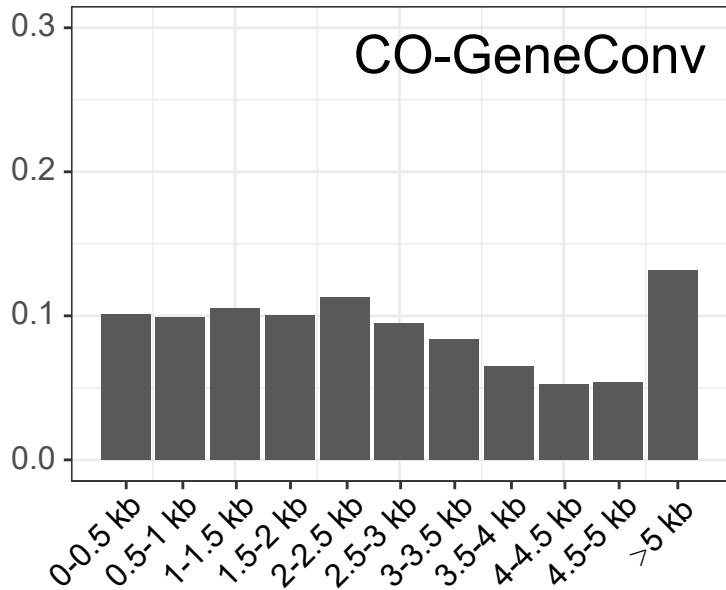

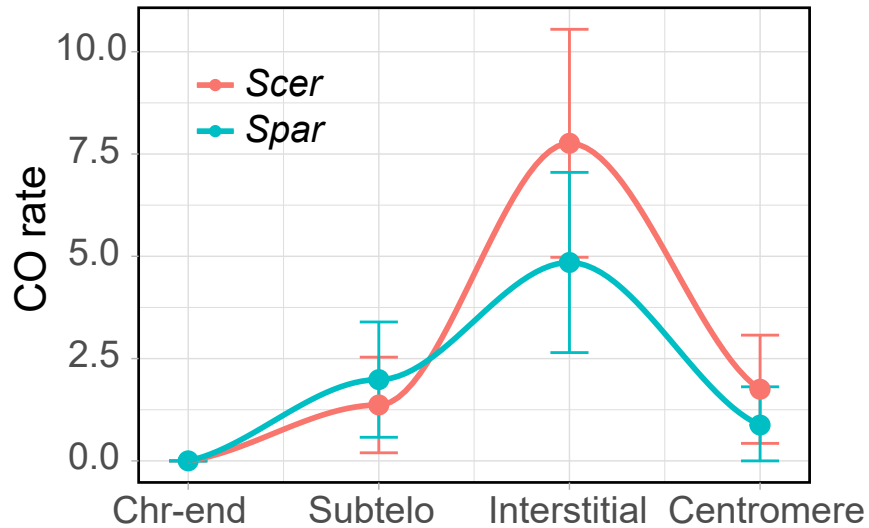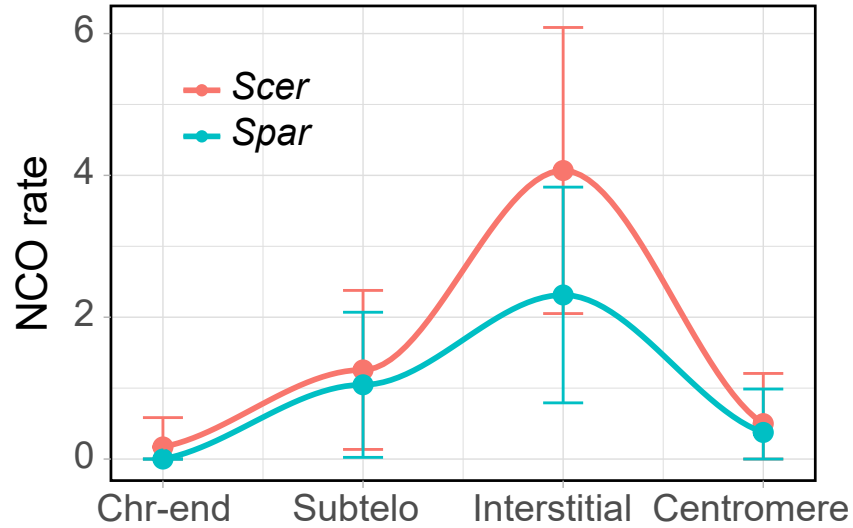

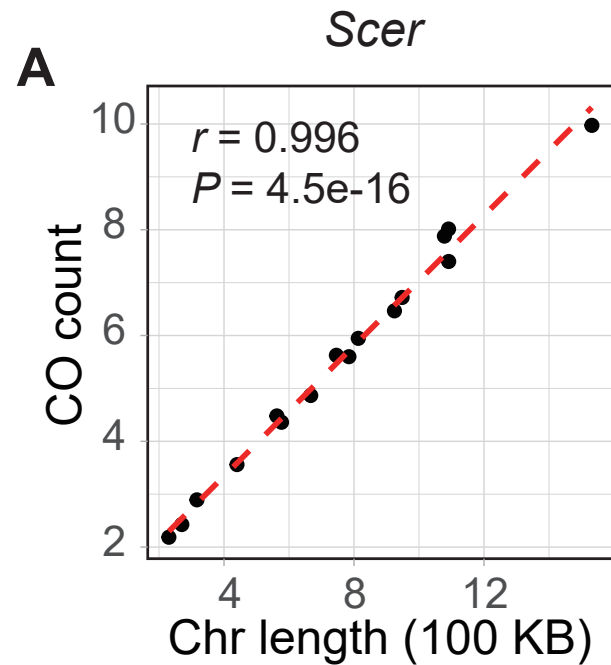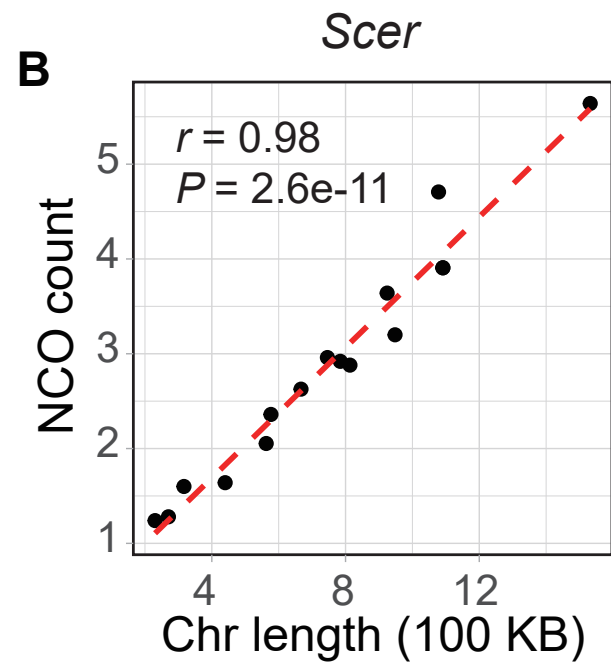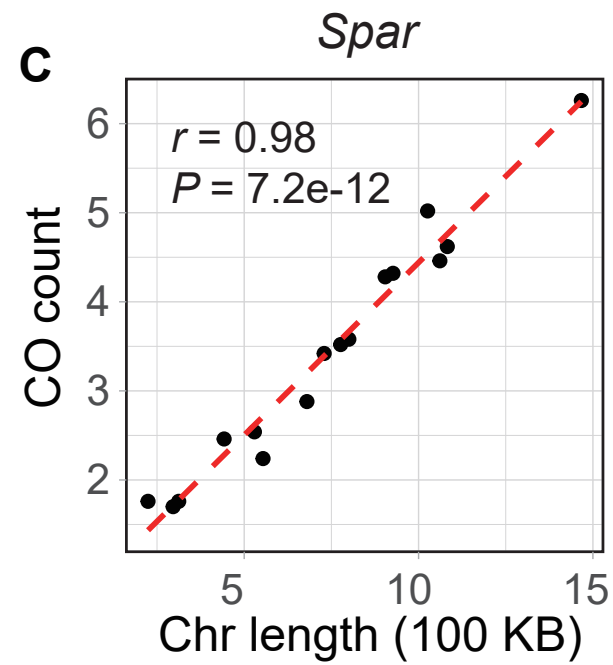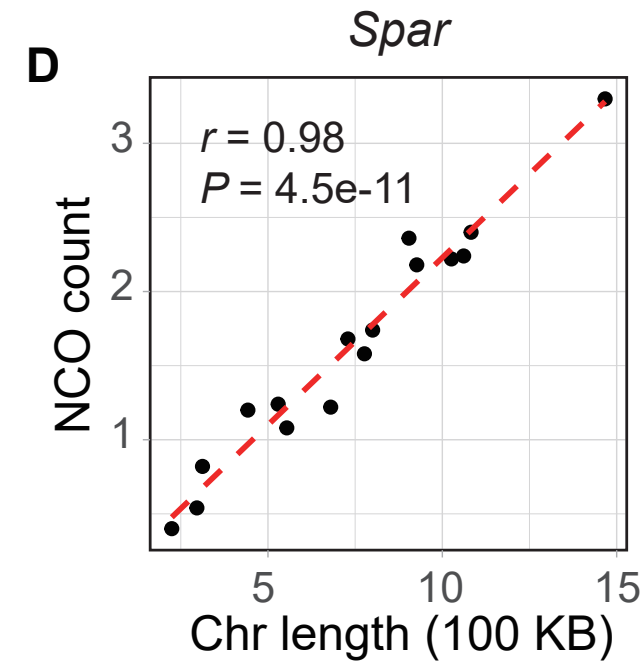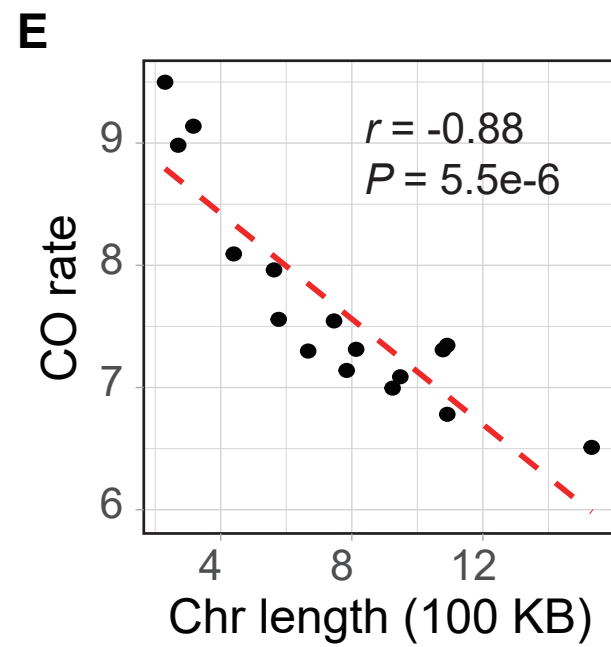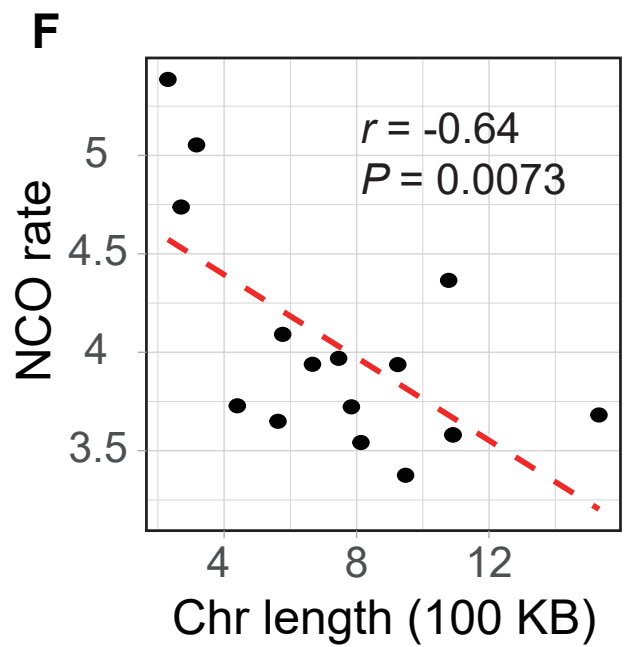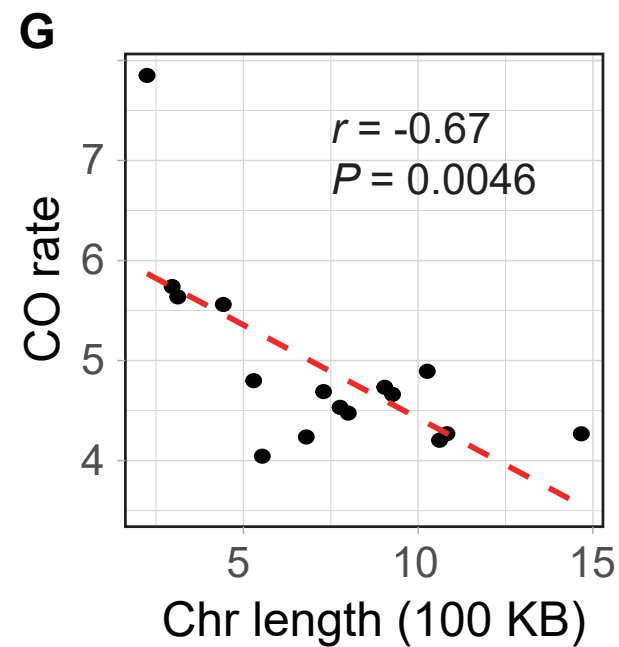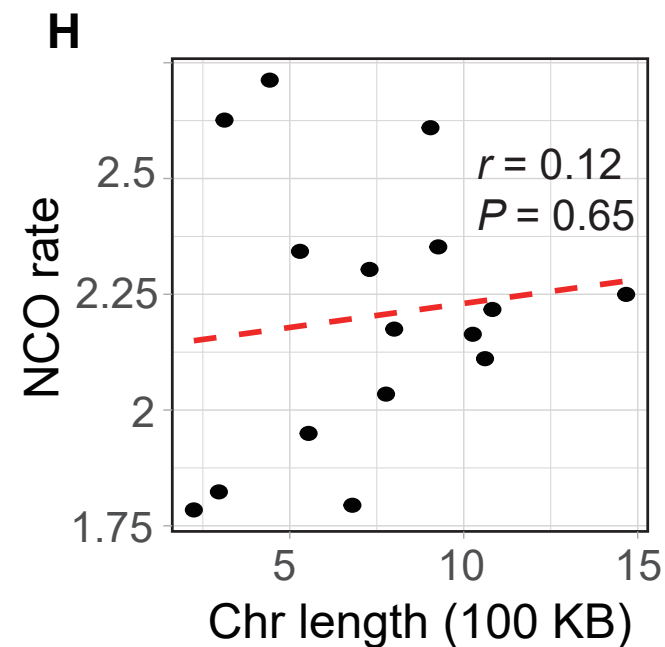

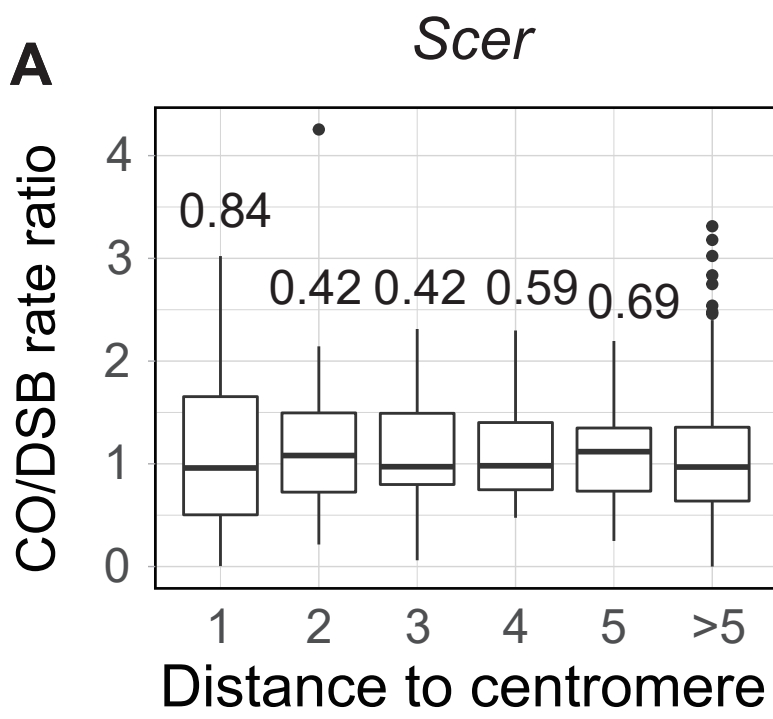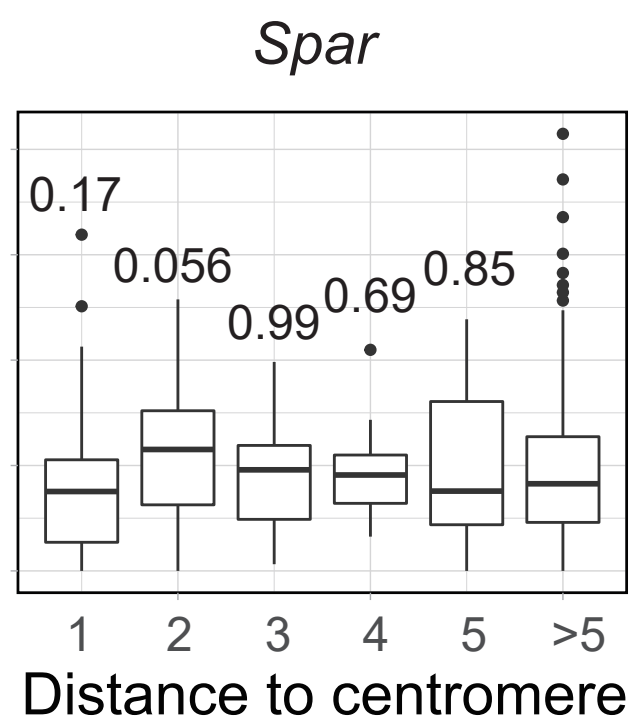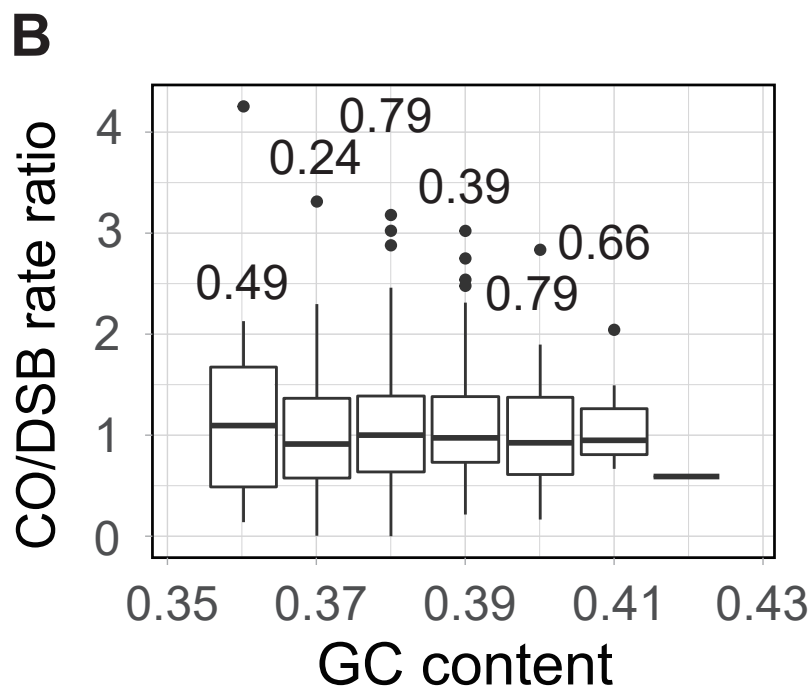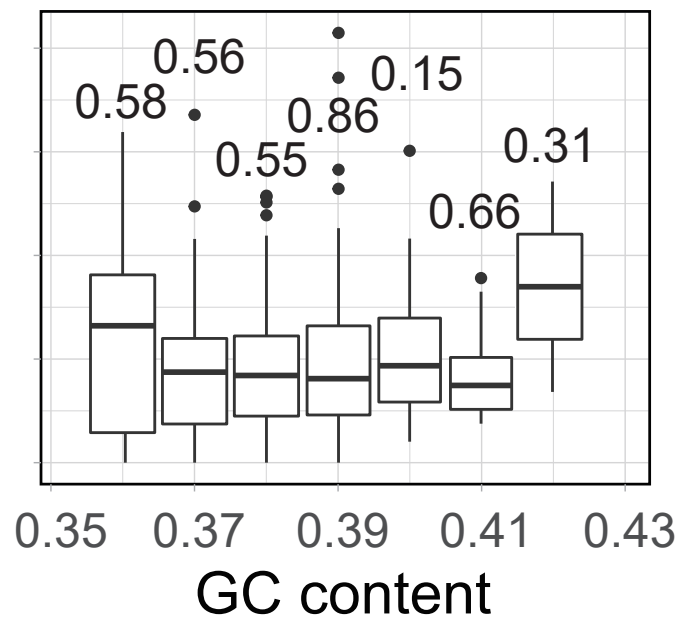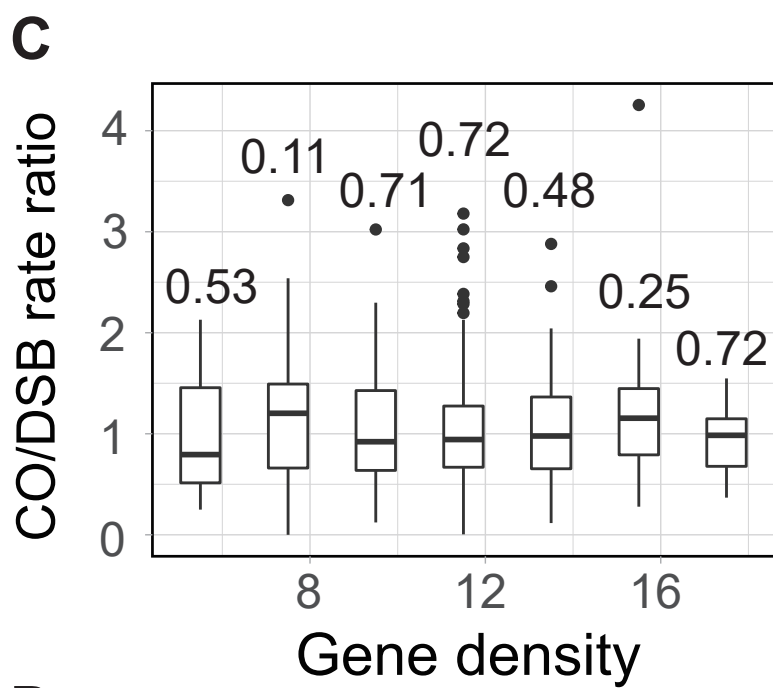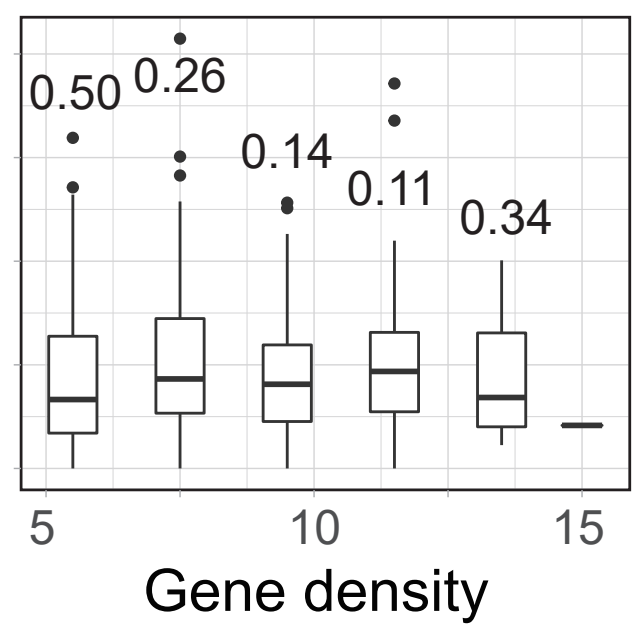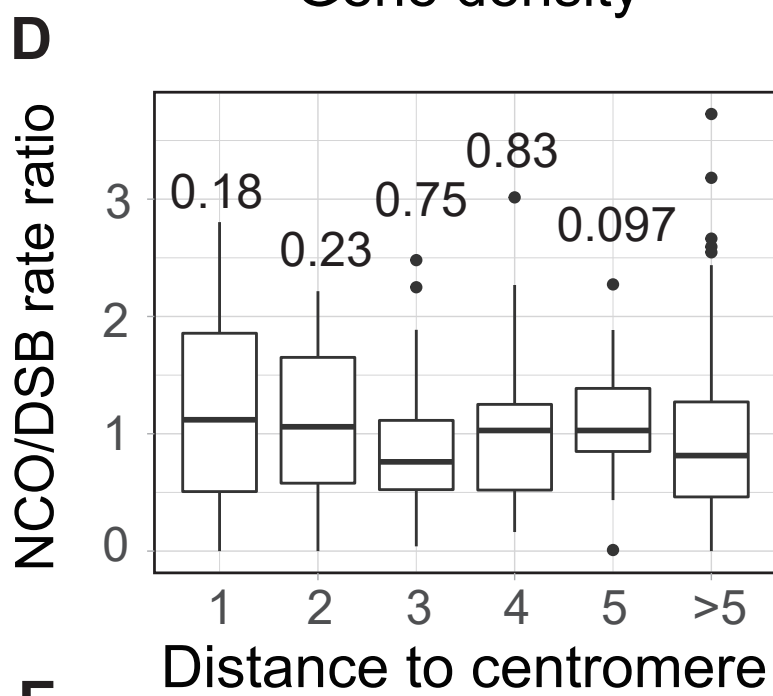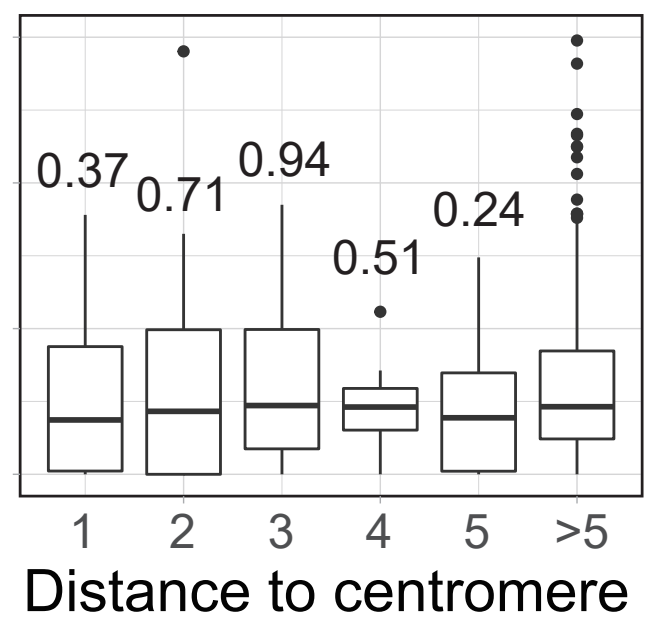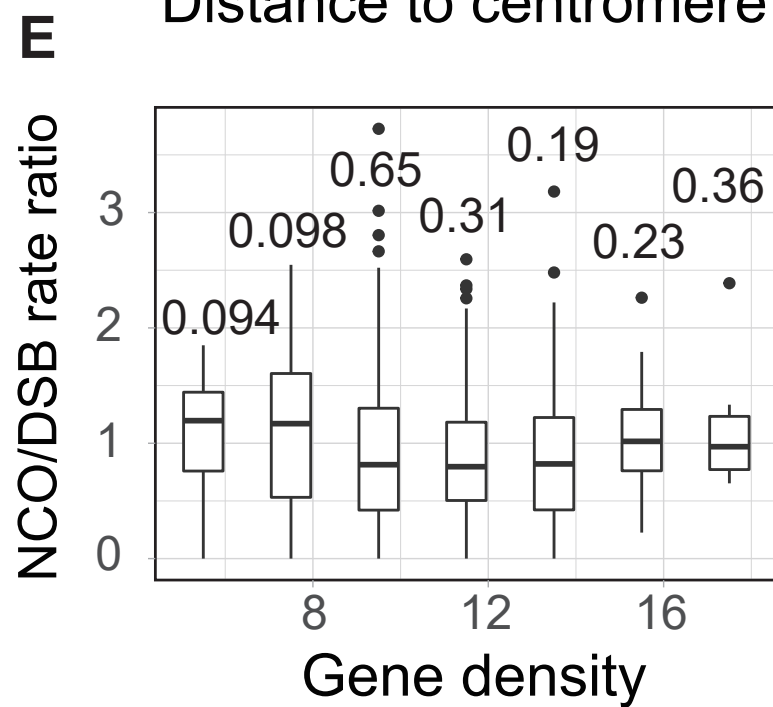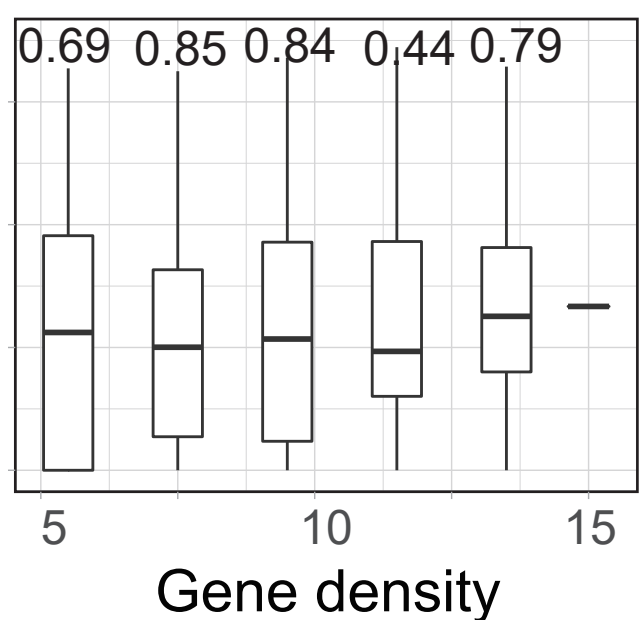

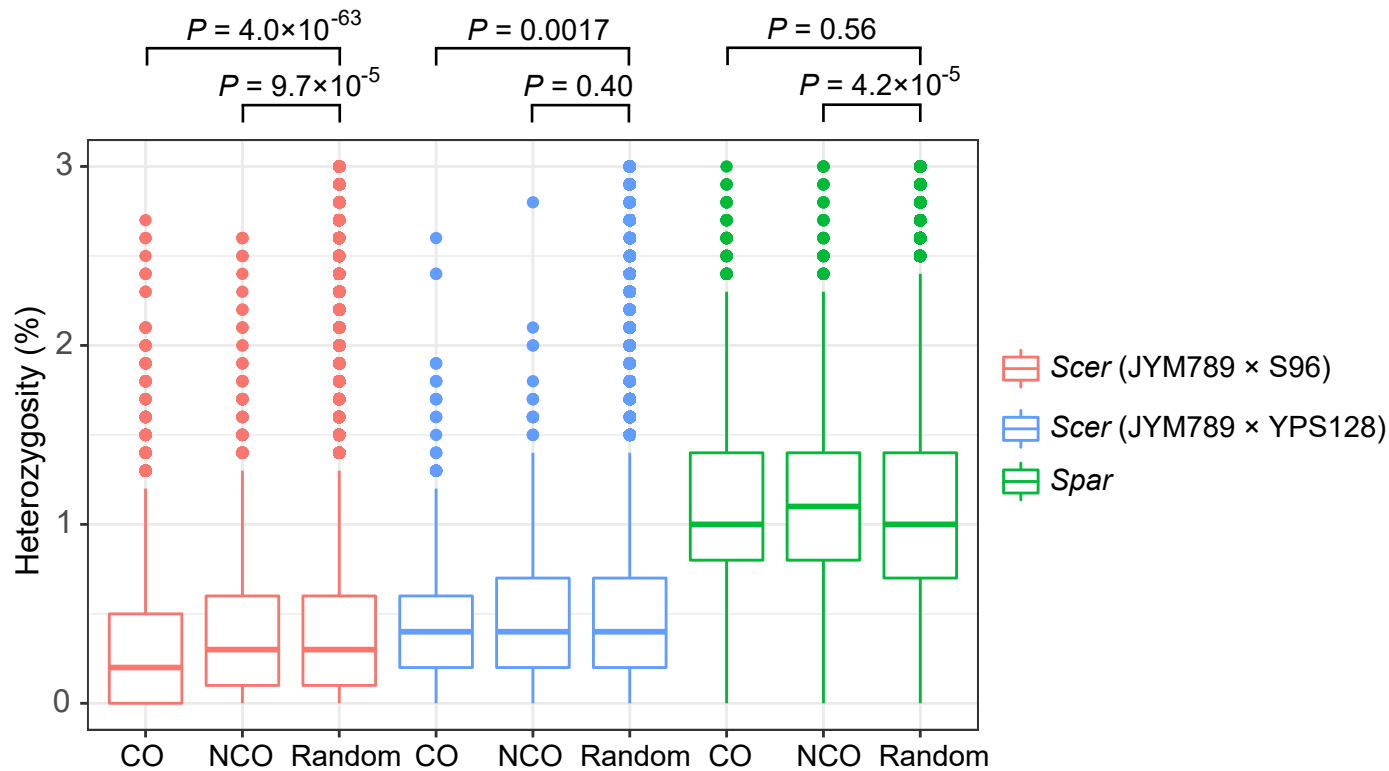

Supplement: msy233_supp.pdf [file msy233_supp.pdf]
